# Supplementary material
Source: Springer Nature journal article supplement (https://www.springermedizin.de/resource/supplementary/13045_2013_326_MOESM3_ESM.pdf/9661130)

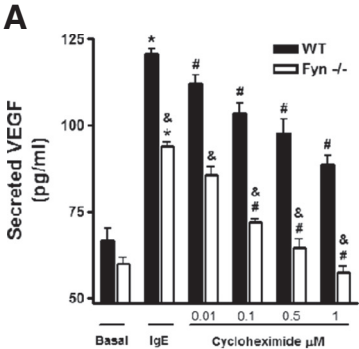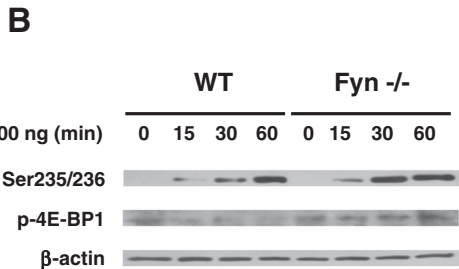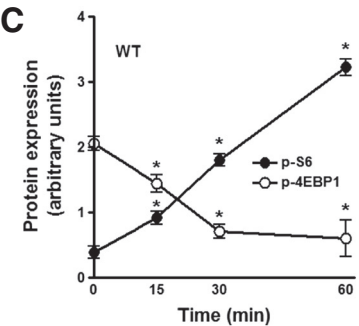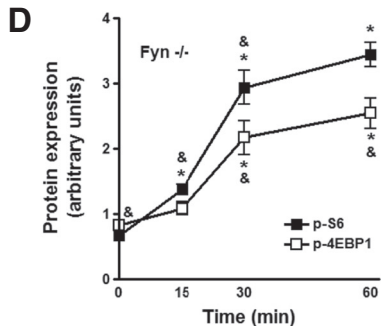

Supplement: MOESM3 [file 9661130]
